# Supplementary material
Source: PubMed Central journal article supplement (PMC2701623)
Supplement: NIHMS108489-supplement-Supplementary_Data.pdf [file NIHMS108489-supplement-Supplementary_Data.pdf]

## Supplementary Materials

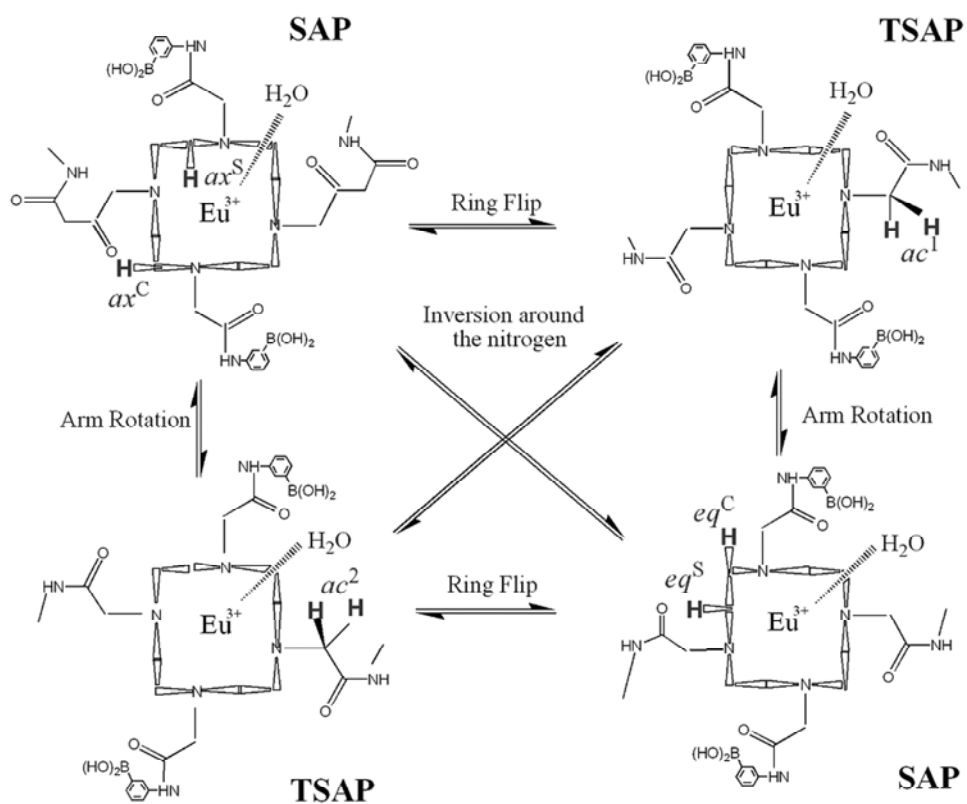

Scheme S1. Schematic presentation of isomer conversion for the EuDOTAM-2M-2PB complex.

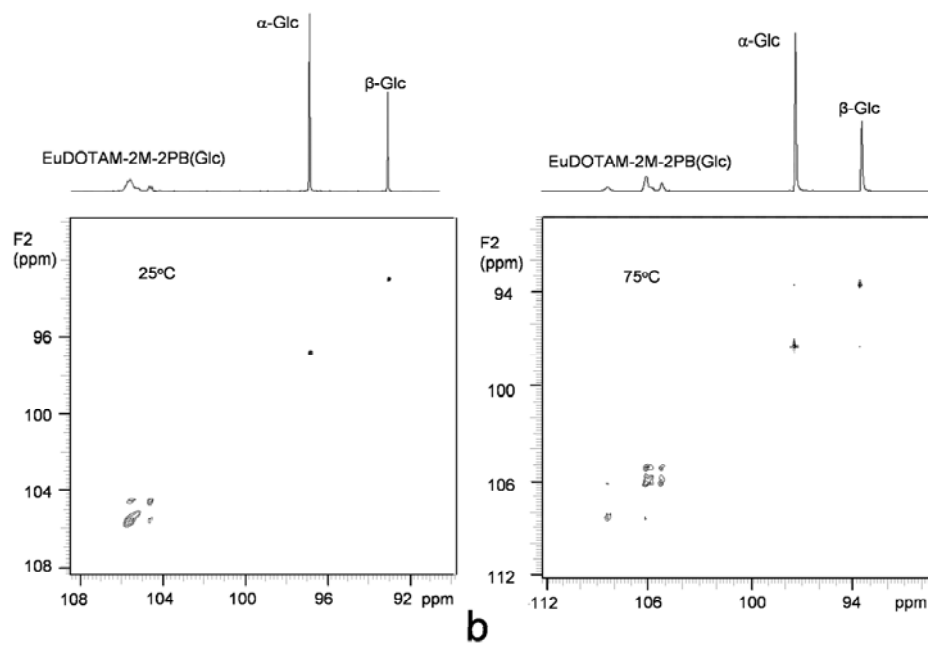

Figure S1.  $^{13}\text{C}$  EXSY spectra of 60 mM glucose- $^{13}\text{C}1$  (99% labeled) in the presence of 20 mM EuDOTAM-2M-2PB at 400 MHz, 25°C (a) and 75°C (b). The mixing time is 5 ms.
